# Supplementary material
Source: PubMed Central journal article supplement (PMC4512543)
Supplement: 10.1534_115.178020_genetics.115.178020-3.pdf [file 10.1534_115.178020_genetics.115.178020-3.pdf]

Table S1 Strains used in this study

| Strain             | Genotype                                                                                                                                                                                                                                                                                                        |
|--------------------|-----------------------------------------------------------------------------------------------------------------------------------------------------------------------------------------------------------------------------------------------------------------------------------------------------------------|
| <b>Tetraploids</b> |                                                                                                                                                                                                                                                                                                                 |
| YJB12712           | <i>MTL<math>\alpha</math>/<math>\alpha</math>/<math>\alpha</math>/<math>\Delta</math>; gal1<math>\Delta</math>/gal1<math>\Delta</math>/gal1<math>\Delta</math>/GAL1; ura3<math>\Delta</math>/ura3<math>\Delta</math>/URA3/URA3 his- leu- ENO1-GFP:NAT/ENO1/ENO1/ENO1</i>                                        |
| YJB12651           | <i>MTL<math>\alpha</math>/<math>\alpha</math>/<math>\Delta</math>/<math>\Delta</math>; gal1<math>\Delta</math>/gal1<math>\Delta</math>/GAL1/GAL1; ura3<math>\Delta</math>/ura3<math>\Delta</math>/URA3/URA3; ade2<math>\Delta</math>/ade2<math>\Delta</math>/ADE2/ADE2; ENO1-GFP:NAT/ENO1-RFP:NAT/ENO1/ENO1</i> |
| YJB12779           | <i>MTL<math>\alpha</math>/<math>\alpha</math>/<math>\alpha</math>/<math>\Delta</math>; gal1<math>\Delta</math>/GAL1/GAL1/GAL1; ade2<math>\Delta</math>/ade2<math>\Delta</math>/ADE2/ADE2 his- leu-</i>                                                                                                          |
| RBY18              | <i>MTL<math>\alpha</math>/<math>\alpha</math>/<math>\Delta</math>/<math>\Delta</math>; gal1<math>\Delta</math>/gal1<math>\Delta</math>/GAL1/GAL1; ura3<math>\Delta</math>/ura3<math>\Delta</math>/URA3/URA3; ade2<math>\Delta</math>/ade2<math>\Delta</math>/ADE2/ADE2</i>                                      |
| <b>Diploids</b>    |                                                                                                                                                                                                                                                                                                                 |
| CHY477             | <i>MTL<math>\alpha</math>/<math>\Delta</math>; ade2<math>\Delta</math>/ade2<math>\Delta</math></i>                                                                                                                                                                                                              |
| DSY917             | <i>MTL<math>\alpha</math>/<math>\alpha</math>; gal1<math>\Delta</math>/GAL1; his- leu-</i>                                                                                                                                                                                                                      |
| DSY919             | <i>MTL<math>\alpha</math>/<math>\alpha</math>; gal1<math>\Delta</math>/GAL1; his- leu-</i>                                                                                                                                                                                                                      |
| YJB12334           | <i>MTL<math>\alpha</math>/<math>\Delta</math>; gal1<math>\Delta</math>/gal1<math>\Delta</math>; ura3<math>\Delta</math>/ura3<math>\Delta</math>; ENO1-GFP:NAT/ENO1</i>                                                                                                                                          |
| YJB12552           | <i>MTL<math>\alpha</math>/<math>\Delta</math>; ade2<math>\Delta</math>/ade2<math>\Delta</math> ENO1-RFP:NAT/ENO1</i>                                                                                                                                                                                            |
