# Supplementary material
Source: PubMed Central journal article supplement (PMC4512543)
Supplement: 10.1534_115.178020_genetics.115.178020-6.pdf [file 10.1534_115.178020_genetics.115.178020-6.pdf]

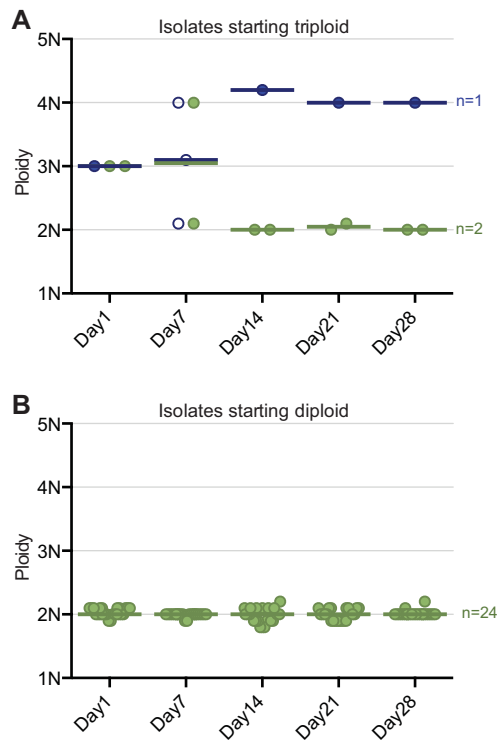

**Figure S3. Ploidy dynamics of triploid and diploid isolates.** Isolates that were initially **A)** triploid (tetraploid LOH-derived from YJB12712 (n=2) and YJB12779 (n=1)) or **B)** diploid (diploid LOH-derived from DSY919 (n=24)) were serially transferred daily in liquid YPD for 28 days. Flow cytometry for ploidy assessment was performed for each isolate on Days 7, 14, 21 and 28. Ploidy values for Day1 are the same data presented in Figures 1 and 2. Isolates are colored by ending ploidy: diploid (green) or tetraploid (blue). Isolates with only a single ploidy are displayed as filled circles and isolates with multiple ploidy subpopulations are displayed as open circles. The median for each class at every timepoint is indicated with a bar.
