# Supplementary material
Source: PubMed Central journal article supplement (PMC4512543)
Supplement: 10.1534_115.178020_genetics.115.178020-8.pdf [file 10.1534_115.178020_genetics.115.178020-8.pdf]

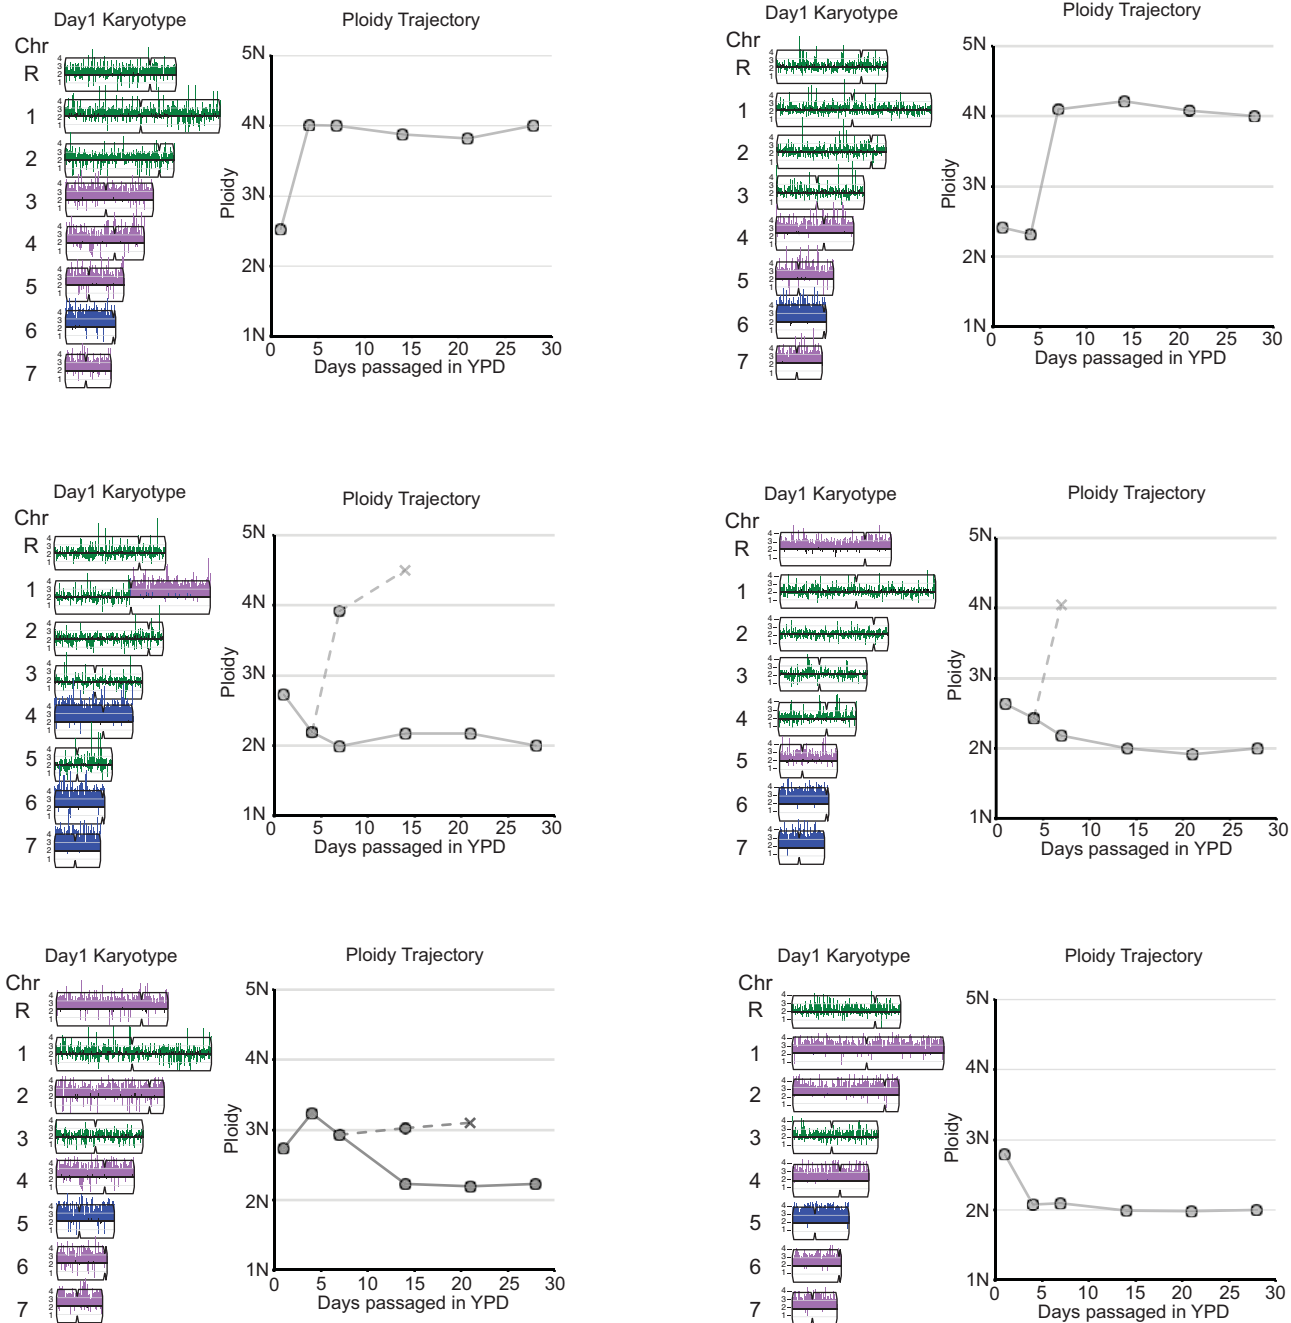

**Figure S6. Long-term ploidy dynamics of complex aneuploid isolates.** Six isolates displayed complex aneuploid karyotypes with di-, tri-, and tetrasomic chromosome combinations (left). Individual ploidy trajectories of the 28-day passaging experiment are shown on the right. Ploidy was assessed after 4, 7, 14, 21 and 28 days of serial transfers in liquid YPD. Data for individual isolates across the passaging experiment are represented by circles and connected with lines. Dashed lines indicate timepoints with multiple ploidy subpopulations and X's represent ploidy subpopulations that became extinct (were not observed in subsequent passages of the same individual culture).
