# Supplementary material
Source: PubMed Central journal article supplement (PMC4512543)
Supplement: 10.1534_115.178020_genetics.115.178020-9.pdf [file 10.1534_115.178020_genetics.115.178020-9.pdf]

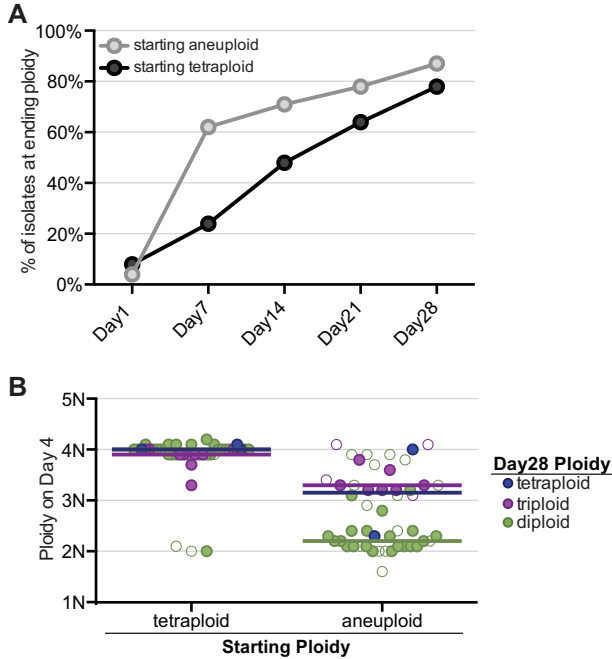

**Figure S5. Timing of ploidy resolution in tetraploid and aneuploid isolates.** A) The percentage of isolates that had reached their ‘ending ploidy’ (defined as Day28 ploidy), throughout the timecourse of the passaging experiment. Isolates that ended with multiple ploidy subpopulations (Figure S2) are included in this metric. B) Ploidy values of isolates on Day4. Isolates are colored by their ultimate ending ploidy: diploid (green), triploid (purple) or tetraploid (blue). Isolates with only a single ploidy are displayed as filled circles and isolates with multiple ploidy subpopulations are displayed as open circles. The median for each class is indicated with a bar of corresponding color.
