# Supplementary material
Source: PubMed Central journal article supplement (PMC4512543)
Supplement: 10.1534_115.178020_genetics.115.178020-10.pdf [file 10.1534_115.178020_genetics.115.178020-10.pdf]

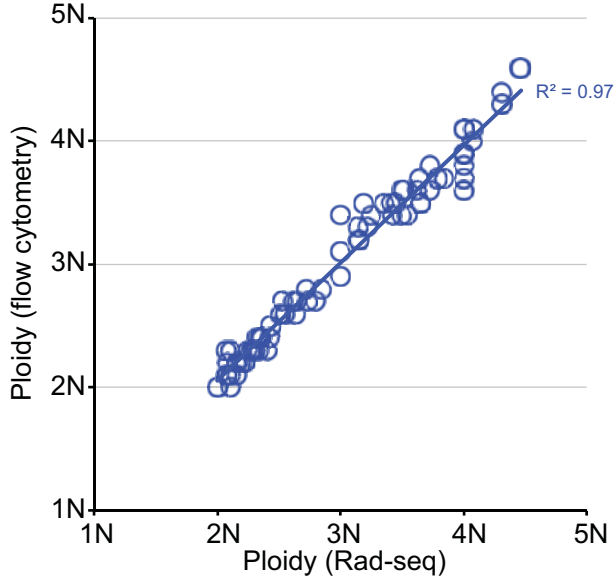

**Figure S1.** Correlation between ploidy estimates as determined by flow cytometry (y-axis) or ddRAD-seq analysis.
